# Supplementary material for: CDCP1 promotes compensatory renal growth by integrating Src and Met signaling
Source: Life Sci Alliance. 2021 Feb 11;4(4):e202000832. doi: 10.26508/lsa.202000832 (PMC7893822; doi:10.26508/lsa.202000832)
Supplement: Supplementary file 15 [file LSA-2020-00832_TableS4.xlsx]

## Sheet: Sheet1
Table S4
Sequence of gRNAs and genotyping primers
Genes	gRNA (5'-3')
Canis CDCP1	ggcgccgccgagccat
Mus musculus Cdcp1	tgagaacccgcaggccgagt
Gene	Forward primer (5'-3')	Reverse primer (5'-3')
Mus musculus Cdcp1	gagtcatggcccactcggcctg	cctcctaaggcttgttccgcgc
