# Supplementary material for: CDCP1 promotes compensatory renal growth by integrating Src and Met signaling
Source: Life Sci Alliance. 2021 Feb 11;4(4):e202000832. doi: 10.26508/lsa.202000832 (PMC7893822; doi:10.26508/lsa.202000832)
Supplement: Supplementary file 16 [file LSA-2020-00832_TableS5.xlsx]

## Sheet: Sheet1
Table S5
Sequence of quantitative RT-PCR primers
Gene	Forward primer (5'-3')	Reverse primer (5'-3')
GAPDH	gattgtcagcaatgcctcct	ggtcatggatgactttggcta
MMP1	gcaaatgcaggcgttctt	agattcagggtgtccgtgtc
MMP2	gacagccctgcaagttcc	ccgtggtacagctgtcgtag
MMP3	tgcagttagagatcacggagac	gggtaggcatgacccaaaa
MMP9	acggccgactatgacacc	ccgtcctgggtgtagagtttc
MMP13	gattcttctggcgattgcat	cggccaaaaggattttgtta
MMP14	ctcgccccagtcattctc	acgcgcagaccatagaactt
MYC	tgccaaaaggtccgaatc	ctgtgaggaggtttgctgtg
CCND1	gacgaactgctgcaaatgg	gtcatggctgccaggttc
